# Supplementary material for: Anti-PD-L1 F(ab) Conjugated PEG-PLGA Nanoparticle Enhances Immune Checkpoint Therapy
Source: PubMed Central journal article supplement (PMC8824669; doi:10.7150/ntno.65544), 2022-01-16
Supplement: ntnov06p0243s1.pdf [file ntnov06p0243s1.pdf]

Supplementary Figure 1: Nanoparticle Size distribution from different Batches.

A

### Size Distribution Report by Intensity

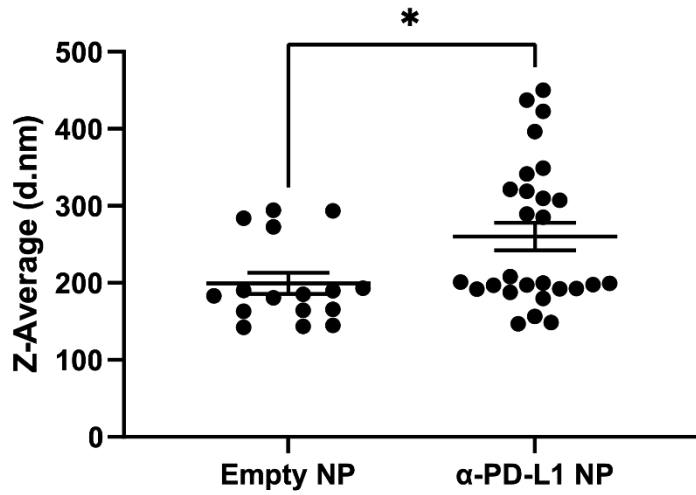

B

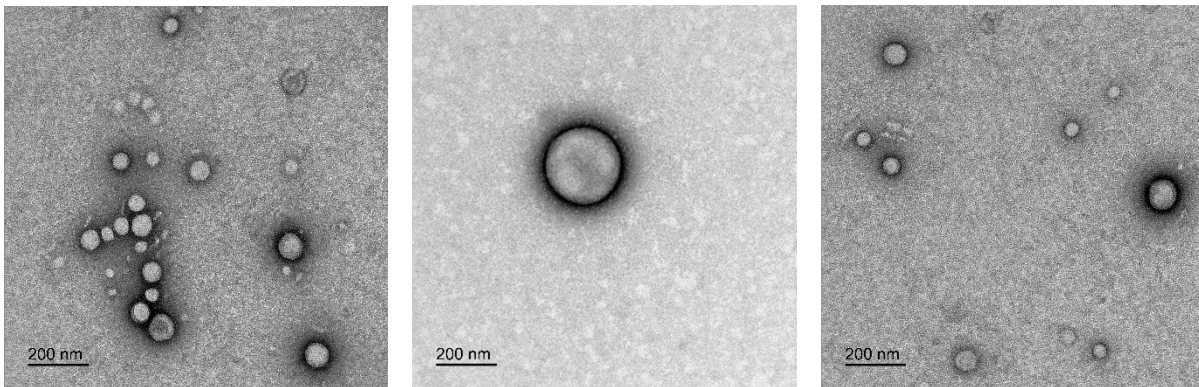

(A) Empty NP and  $\alpha$ -PD-L1 F(ab)-PEG-PLGA were measured each time the nanoparticles were generated for experiment. Each dot is representative of individual batches. (B) TEM of  $\alpha$ -PD-L1 F(ab)-PEG-PLGA. The scale bar represents 200 nm for all panels.

Supplementary Figure 2: Intratumoral (IT) injection.

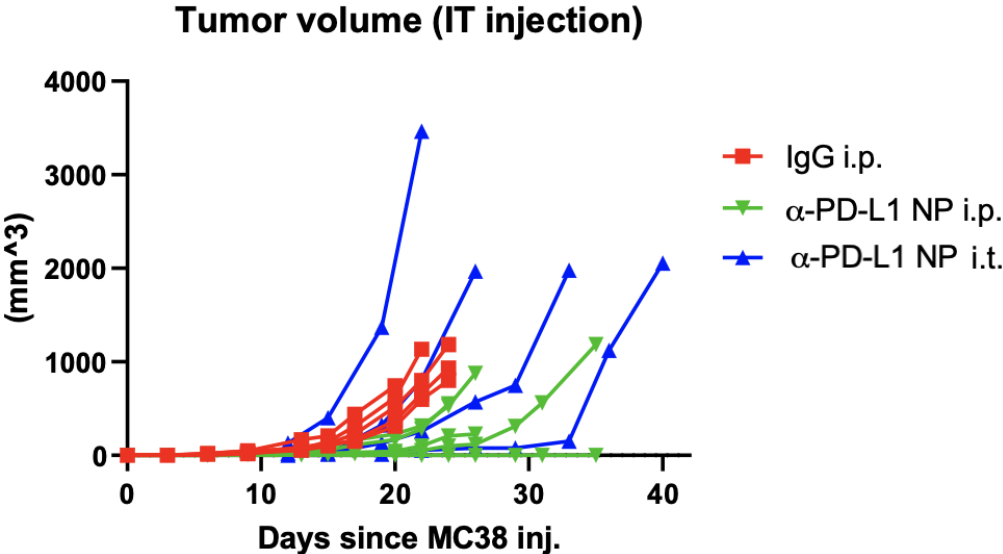

Tumor growth curve *in vivo* when α-PD-L1 NP was injected IP versus IT (mice injected day 4, 7, and 10 post-MC38).

Supplementary Figure 3: PD-L1 expression in tumor.

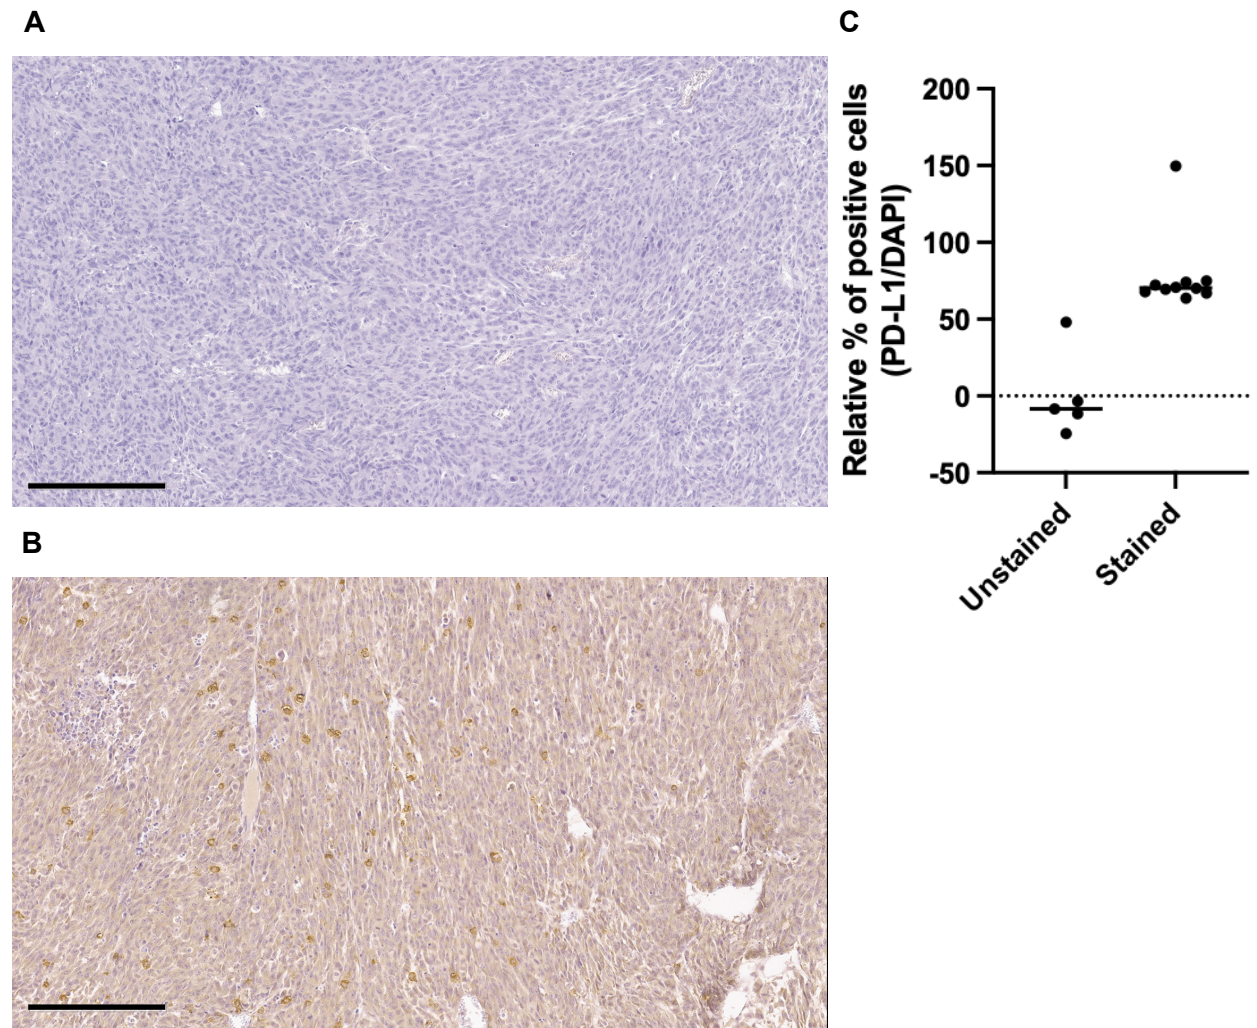

Representative IHC of PD-L1 of tumor at day 24 post MC38 injection. (A) Unstained, (B) stained, and (C) quantification (n=5 mice in IgG IP group). The scale bar represents 200  $\mu$ m.

**Supplementary Table 1: Multiparameter Flow Cytometry Antibody List.**

| <b>Cellular Marker</b> | <b>Fluor</b>    | <b>Clone</b> | <b>Manufacturer</b> | <b>Catalog #</b> |
|------------------------|-----------------|--------------|---------------------|------------------|
| CD4                    | Alexa 488       | GK1.5        | ebiosciences        | 53-0041-82       |
| CD8a                   | PERCP-eFluor710 | 53-6.7       | invitrogen          | 46-0081-82       |
| CD8a                   | PECY5.5         | 53-6.7       | ebiosciences        | 35-0081-82       |
| CD3e                   | BUV 395         | 145-2C11     | BD Horizon          | 565992           |
| CD11c                  | BV 605          | HL3          | BD Horizon          | 563057           |
| CD11b                  | BV786/785       | M1/70        | Biologend           | 101243           |
| NK1.1                  | BV 650          | PK136        | BD Horizon          | 564143           |
| CD19                   | BV711           | 1D3          | BD Horizon          | 563157           |
| MHCII                  | BV 421          | M5/114.15.2  | Biologend           | 107631           |
| B220                   | Alexa 647       | RA3-6B2      | ebiosciences        | 17-0452-82       |
| Ly6C/G                 | Alexa 700       | RB6-8C5      | invitrogen          | 56-5931-82       |
| CD49b                  | PE              | DX5          | ebiosciences        | 12-5971-82       |
| CD49b                  | PECY5           | DX5          | ebiosciences        | 15-5971-80       |
| CD45                   | PE              | 30-F11       | BD Pharmingen       | 553081           |
| F4/80                  | PECY7           | BM8          | invitrogen          | 25-4801-82       |
